# Supplementary material
Source: publisher site journal article supplement (https://www.dovepress.com/article/259893)
Supplement: Supplementary file 1 [file get_supplementary_file.php]

Tumor mutation burden (TMB) is defined as the total number of missense mutations. We profiled the TMB of these samples by using a targeted next-generation sequencing (NGS) panel (Geneseeq). Panel TMB was counted by summing all base substitutions and InDels in the coding region of targeted genes, including synonymous alterations to reduce sampling noise and excluding known driver mutations as they are over-represented in the Panel, as previously described.1 High TMB was defined as ≥10 mutations based on clinically validated procedures, as mentioned before.2

1. Chalmers ZR, Connelly CF, Fabrizio D, et al. Analysis of 568 100,000 human cancer genomes reveals the landscape of tumor mutational burden. *Genome Med*. 2017;9(1):34.
2. Fang W, Ma Y, Jiani C, et al. Comprehensive Genomic Profiling Identifies Novel Genetic Predictors of Response to Anti-PD-(L)1 Therapies in Non-Small-Cell Lung Cancer. *Clin Cancer Res*. 2019;25(16):5015–5026.
